# Supplementary material
Source: publisher figshare collection journal article supplement (https://tandf.figshare.com/ndownloader/files/8925997)

## SUPPLEMENTARY MATERIAL

### Chemical constituents from *Curcuma longa* L. and their inhibitory effects of nitric oxide production

Ting Yuan<sup>a</sup>, Cuiyun Zhang<sup>a</sup>, Chongyue Qiu<sup>a</sup>, Guiyang Xia<sup>a</sup>, Fei Wang<sup>a</sup>, Bin Lin<sup>b</sup>, Hua Li<sup>a,c,\*</sup>, Lixia Chen<sup>a,\*</sup>

<sup>a</sup> *Wuya College of Innovation, School of Traditional Chinese Materia Medica, Key Laboratory of Structure-Based Drug Design & Discovery, Ministry of Education, Shenyang Pharmaceutical University, Shenyang 110016, People's Republic of China.*

<sup>b</sup> *School of Pharmaceutical Engineering, Key Laboratory of Structure-Based Drug Design & Discovery, Ministry of Education, Shenyang Pharmaceutical University, Shenyang 110016, People's Republic of China.*

<sup>c</sup> *Hubei Key Laboratory of Natural Medicinal Chemistry and Resource Evaluation, School of Pharmacy, Tongji Medical College, Huazhong University of Science and Technology, Wuhan 430030, People's Republic of China.*

#### \*Corresponding author

E-mail: syzyclx@163.com (Lixia Chen); li\_hua@hust.edu.cn (Hua Li)

A new bisabolane-type sesquiterpenoid, turmerone Q (**1**), along with six known compounds (**2-7**), were isolated from the rhizomes of *Curcuma longa* L. The structural elucidation of the new compound was conducted using <sup>1</sup>H NMR, <sup>13</sup>C NMR, HSQC, HMBC, and NOESY spectroscopic analyses. The absolute configuration of **1** was elucidated by comparison of the experimental and calculated ECD spectra. The anti-inflammatory effects of **1-7** were evaluated through lipopolysaccharide-induced nitric oxide (NO) production in RAW 264.7 macrophages assays, and compounds **6** and **7** showed potent inhibitory activity against NO production.

Keywords: *Curcuma longa* L.; sesquiterpenoids; nitric oxide.

## List of Supplementary material

Table S1. The  $^1\text{H}$  and  $^{13}\text{C}$  NMR spectroscopic data of **1**.

Table S2. Inhibitory effects of compounds **1-7** on NO production induced by LPS in macrophages.

Figure S1. HR-ESI-MS spectrum of compound **1**.

Figure S2. IR spectrum of compound **1**.

Figure S3. Key HMBC and NOESY correlations of compound **1**.

Figure S4. Experimental ECD of compound **1**.

Figure S5. Calculated ECD spectra of **1a** (1'S, 5'R, 6S)-isomer and **1b** (1'R, 5'S, 6R)-isomer and the experimental ECD spectrum of **1** in methanol.

Figure S6. UV spectrum of compound **1**.

Figure S7. The  $^1\text{H}$  NMR spectrum of compound **1**.

Figure S8. The  $^{13}\text{C}$  NMR spectrum of compound **1**.

Figure S9. The HSQC spectrum of compound **1**.

Figure S10. The HMBC spectrum of compound **1**.

Figure S11. The  $^1\text{H}$ - $^1\text{H}$  COSY spectrum of compound **1**.

Figure S12. The NOESY spectrum of compound **1**.

Figure S13. The  $^1\text{H}$  NMR spectrum of compound **2**.

Figure S14. The  $^{13}\text{C}$  NMR spectrum of compound **2**.

Figure S15. The  $^1\text{H}$  NMR spectrum of compound **3**.

Figure S16. The  $^{13}\text{C}$  NMR spectrum of compound **3**.

Figure S17. The  $^1\text{H}$  NMR spectrum of compound **4**.

Figure S18. The  $^{13}\text{C}$  NMR spectrum of compound **4**.

Figure S19. The  $^1\text{H}$  NMR spectrum of compound **5**.

Figure S20. The  $^{13}\text{C}$  NMR spectrum of compound **5**.

Figure S21. The  $^1\text{H}$  NMR spectrum of compound **6**.

Figure S22. The  $^{13}\text{C}$  NMR spectrum of compound **6**.

Figure S23. The  $^1\text{H}$  NMR spectrum of compound **7**.

Figure S24. The  $^{13}\text{C}$  NMR spectrum of compound **7**.

**Table S1** The  $^1\text{H}$  and  $^{13}\text{C}$  NMR spectroscopic data of **1** in  $\text{CDCl}_3$ 

| No. | <b>1</b>                              |                                                  |
|-----|---------------------------------------|--------------------------------------------------|
|     | $\delta_{\text{C}}^{\text{a}}$ , type | $\delta_{\text{H}}^{\text{b}}$ ( <i>J</i> in Hz) |
| 1'  | 35.8, CH                              | 2.49 brd (11.7)                                  |
| 2'  | 133.3, CH                             | 5.74 d (10.0)                                    |
| 3'  | 127.6, CH                             | 6.17 dd (10.0, 2.0)                              |
| 4'  | 145.0, C                              | --                                               |
| 5'  | 69.4, CH                              | 4.44 dd (3.0, 3.5)                               |
| 6'  | 31.9, CH <sub>2</sub>                 | 1.49 ddd (11.8, 2.6, 3.0)                        |
|     |                                       | 1.88 m                                           |
| 7'  | 114.1, CH <sub>2</sub>                | 4.99 br s,                                       |
|     |                                       | 5.08 br s                                        |
| 1   | 29.5, CH <sub>3</sub>                 | 1.25 s                                           |
| 2   | 69.9, C                               | --                                               |
| 3   | 53.8, CH <sub>2</sub>                 | 2.61 d (17.1)                                    |
|     |                                       | 2.59 d (17.1)                                    |
| 4   | 212.9, C                              | --                                               |
| 5   | 49.0, CH <sub>2</sub>                 | 2.26 overlapped                                  |
|     |                                       | 2.47 overlapped                                  |
| 6   | 32.3, CH                              | 2.26 overlapped                                  |
| 7   | 16.9, CH <sub>3</sub>                 | 0.92 d (6.4)                                     |
| 8   | 29.5, CH <sub>3</sub>                 | 1.25 s                                           |

**Table S2. Inhibitory effects of compounds 1-7 on NO production induced by LPS in RAW 264.7 macrophages ( $\text{IC}_{50}^{\text{a}}$  :  $\mu\text{M}$ )**

| Compound                    | $\text{IC}_{50}$ | Compound | $\text{IC}_{50}$ |
|-----------------------------|------------------|----------|------------------|
| 1                           | 97.57            | 5        | 53.96            |
| 2                           | 80.19            | 6        | 12.93            |
| 3                           | 83.82            | 7        | 14.42            |
| 4                           | 38.85            | -        | -                |
| hydrocortisone <sup>b</sup> | 37.64            | -        | -                |

a : Inhibitory effects of compounds **1-7** on NO production induced by LPS in RAW 264.7 macrophages.

b : Positive control.



**Figure S1 HR-ESI-MS spectrum of compound 1**

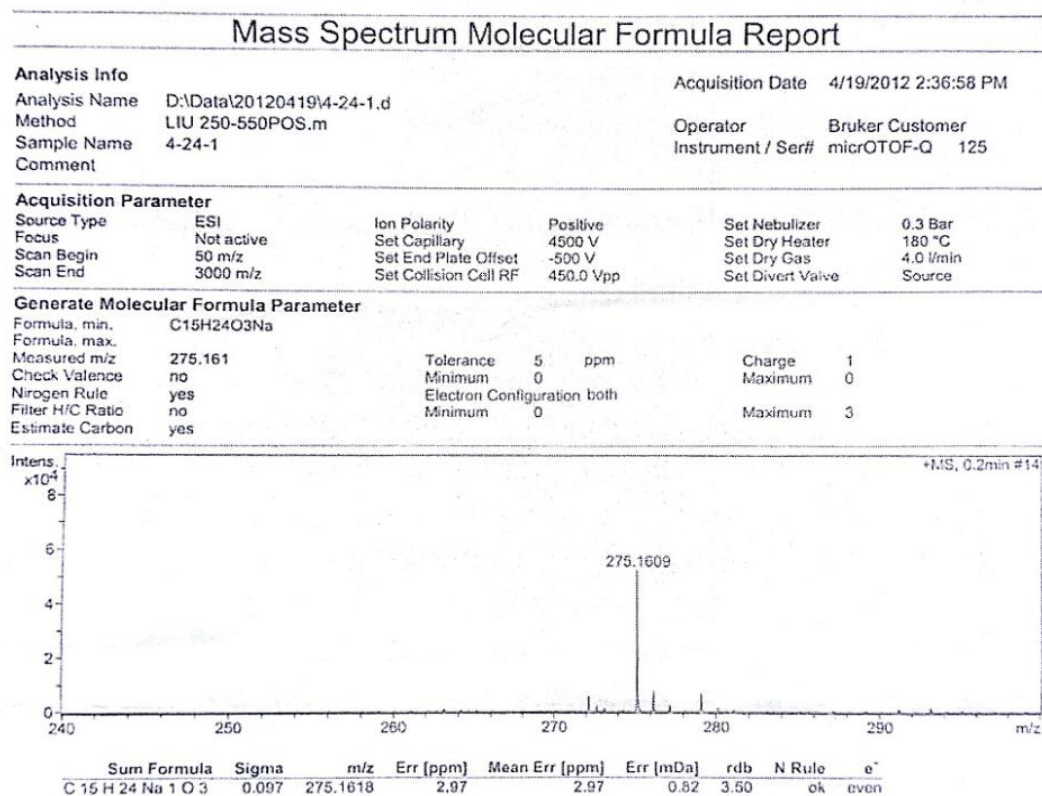

**Figure S2 IR spectrum of compound 1**

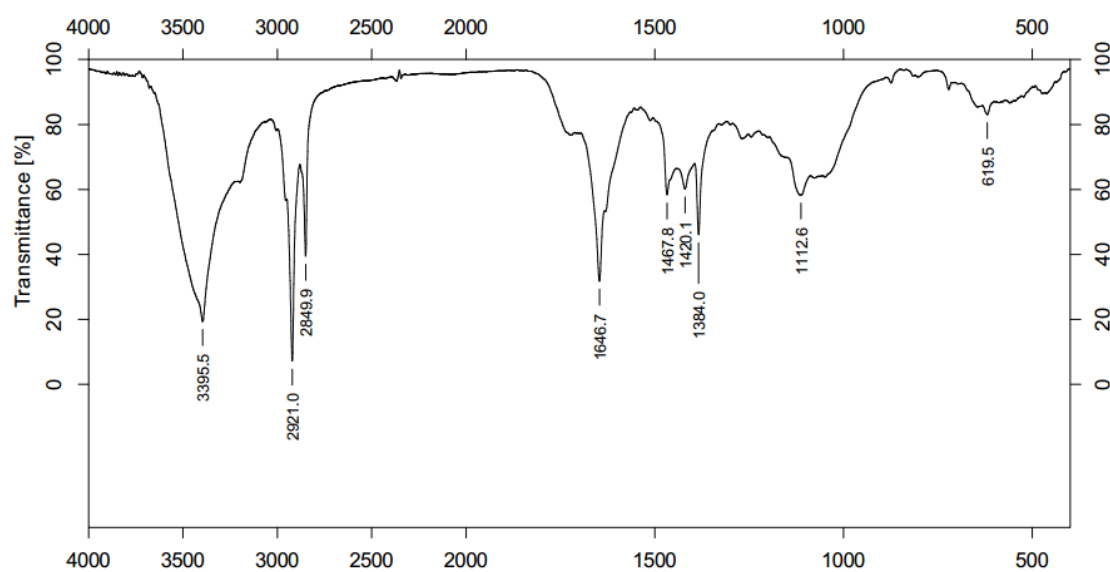

**Figure S3. Key HMBC and NOESY correlations of compound 1.**

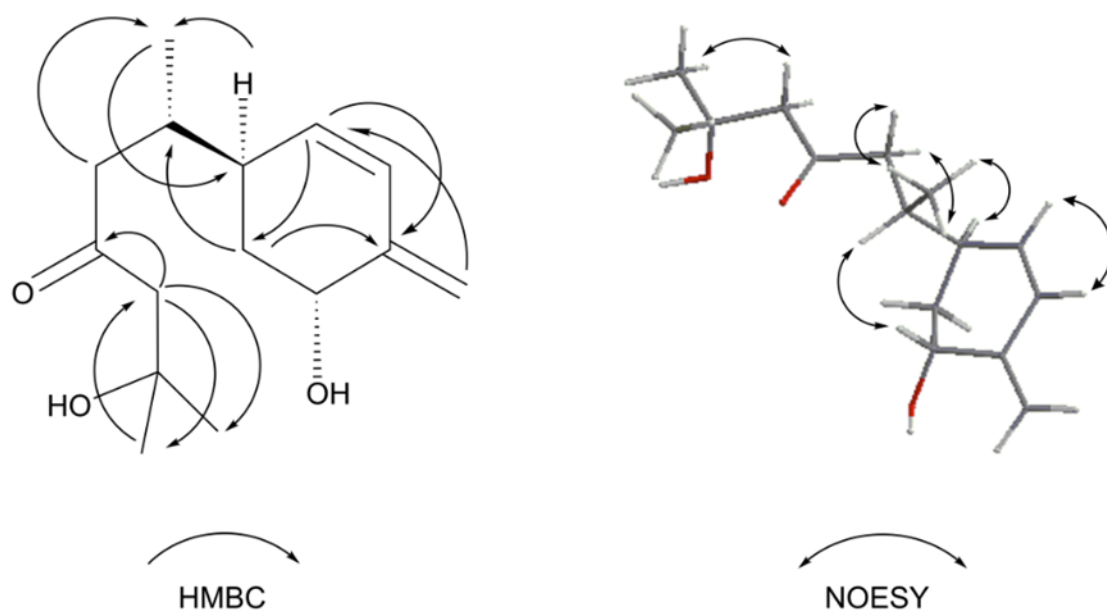

**Figure S4. Experimental ECD of compound 1 in methanol.**

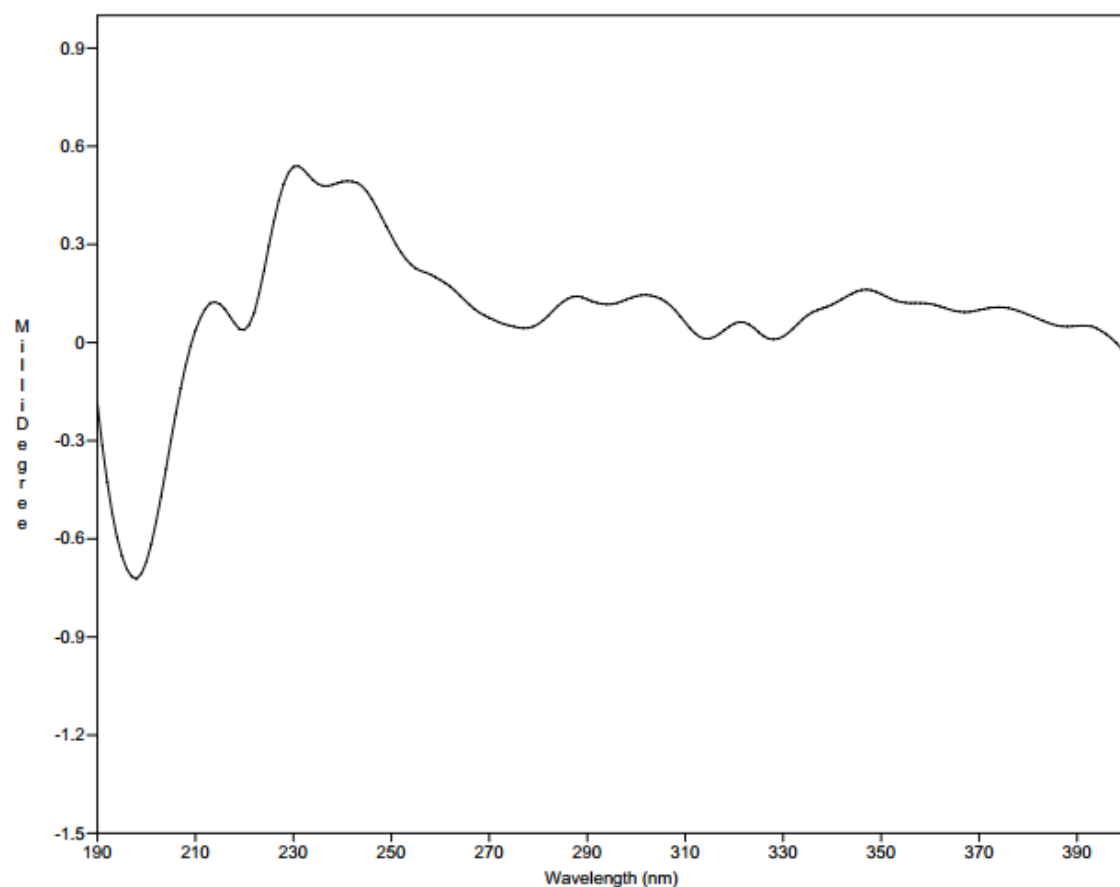

**Figure S5. Calculated ECD spectra of 1a (1'S, 5'R, 6S)-isomer and 1b (1'R, 5'S, 6R)-isomer and the experimental ECD spectrum of 1 in methanol.**

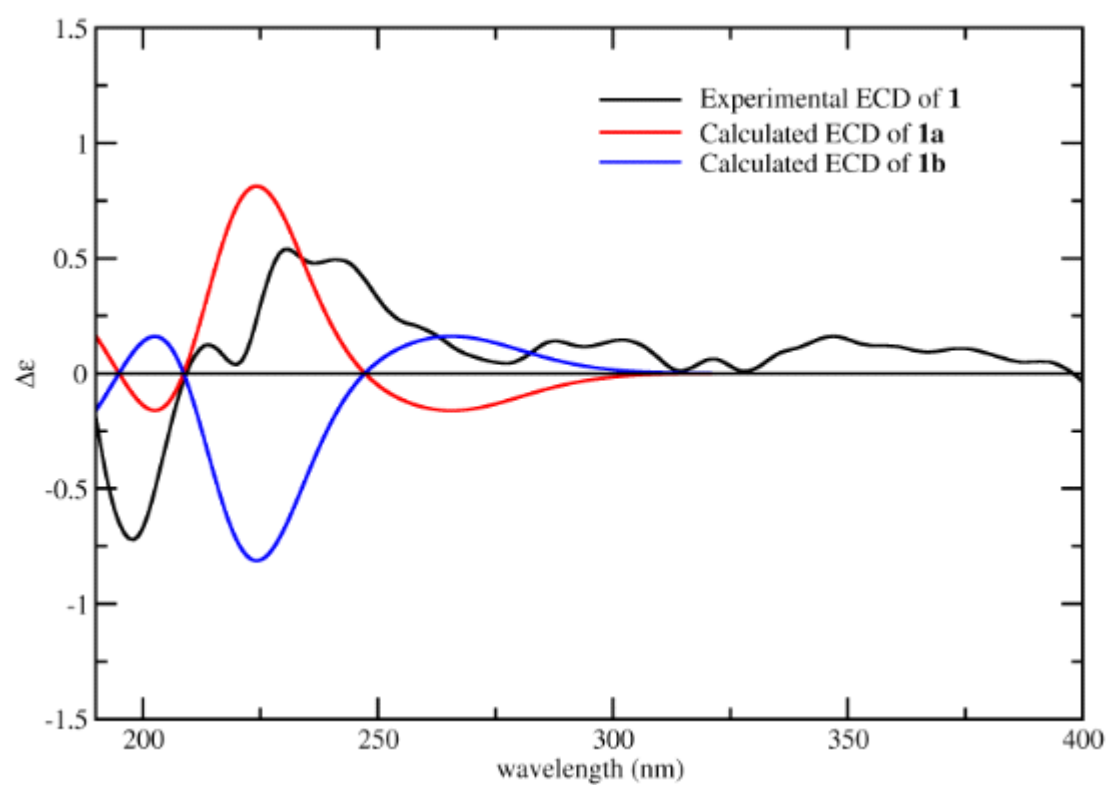

Figure S6. UV spectrum of compound 1.

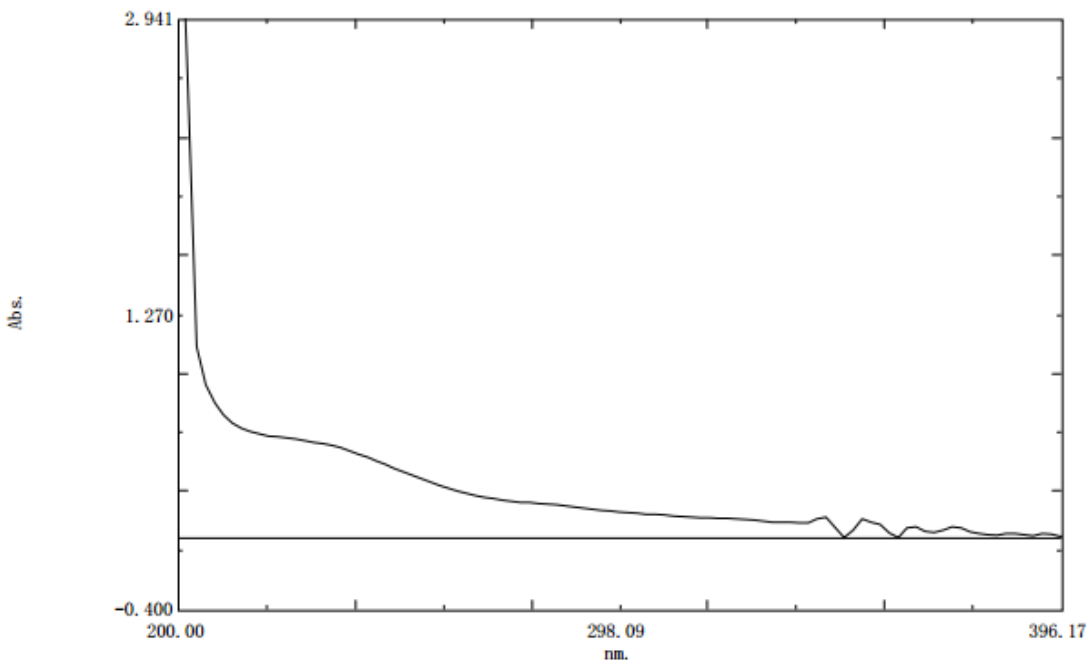

| No. | Wavelength | 吸收值  | 描述 |
|-----|------------|------|----|
| 1   | 206.00     | .872 |    |
| 2   | 228.00     | .555 |    |
| 3   | 352.00     | .110 |    |
| 4   | 344.00     | .121 |    |
| 5   | 364.00     | .065 |    |
| 6   | 232.00     | .538 |    |
| 7   | 266.00     | .242 |    |
| 8   |            |      |    |

Figure S7 The <sup>1</sup>H NMR spectrum of compound 1 in CDCl<sub>3</sub>



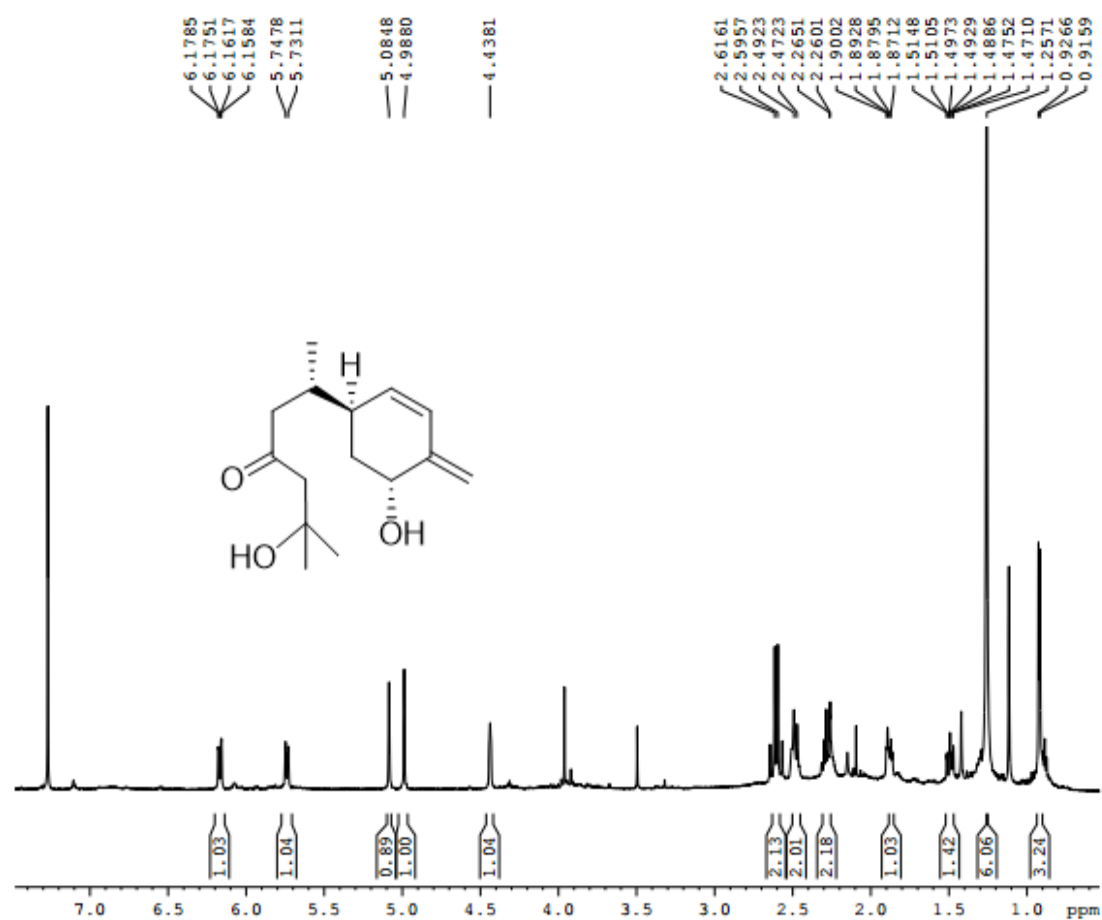

Figure S8 The <sup>13</sup>C NMR spectrum of compound 1 in CDCl<sub>3</sub>

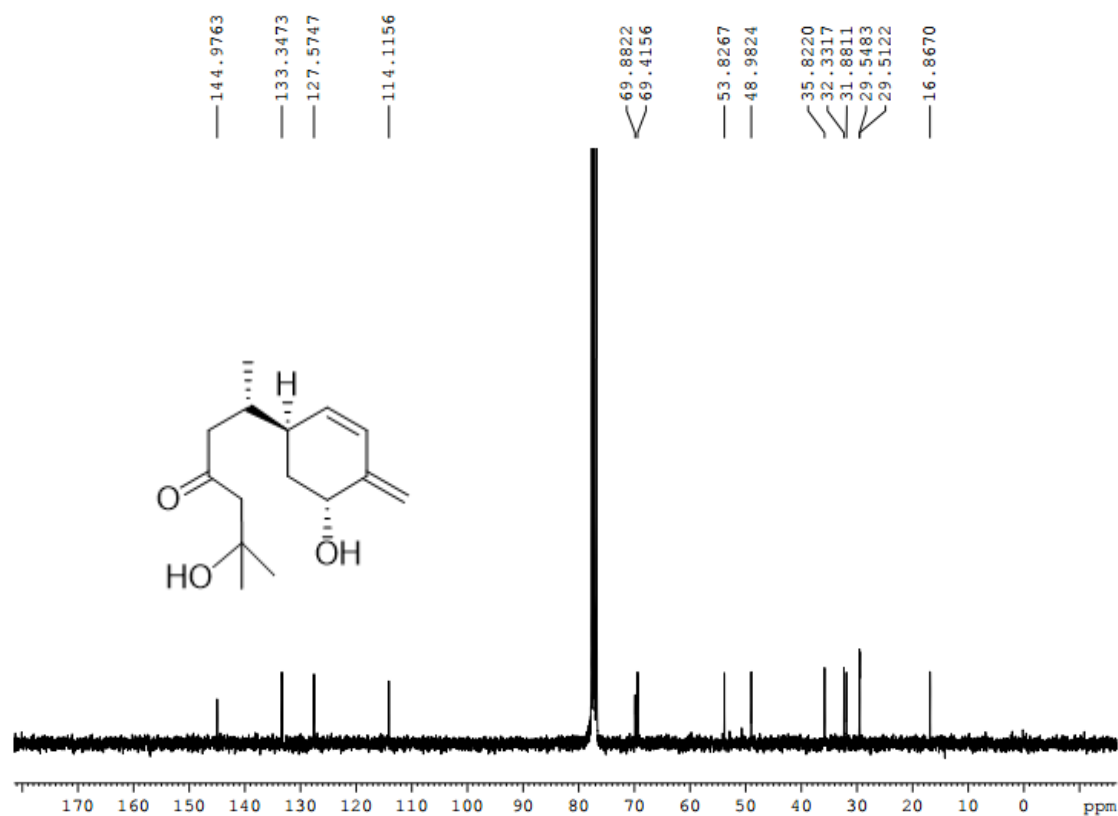

**Figure S9** The HSQC spectrum of compound **1** in CDCl<sub>3</sub>

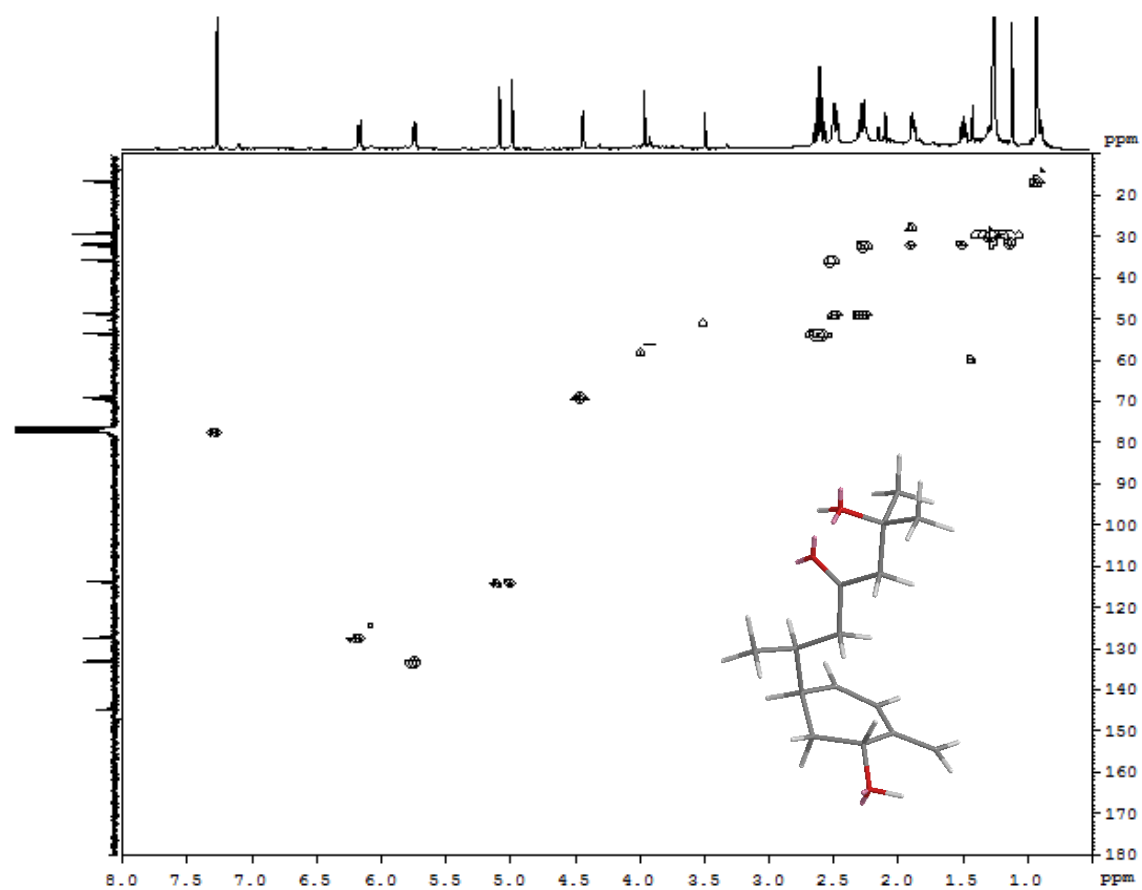

**Figure S10** The HMBC spectrum of compound **1** in CDCl<sub>3</sub>

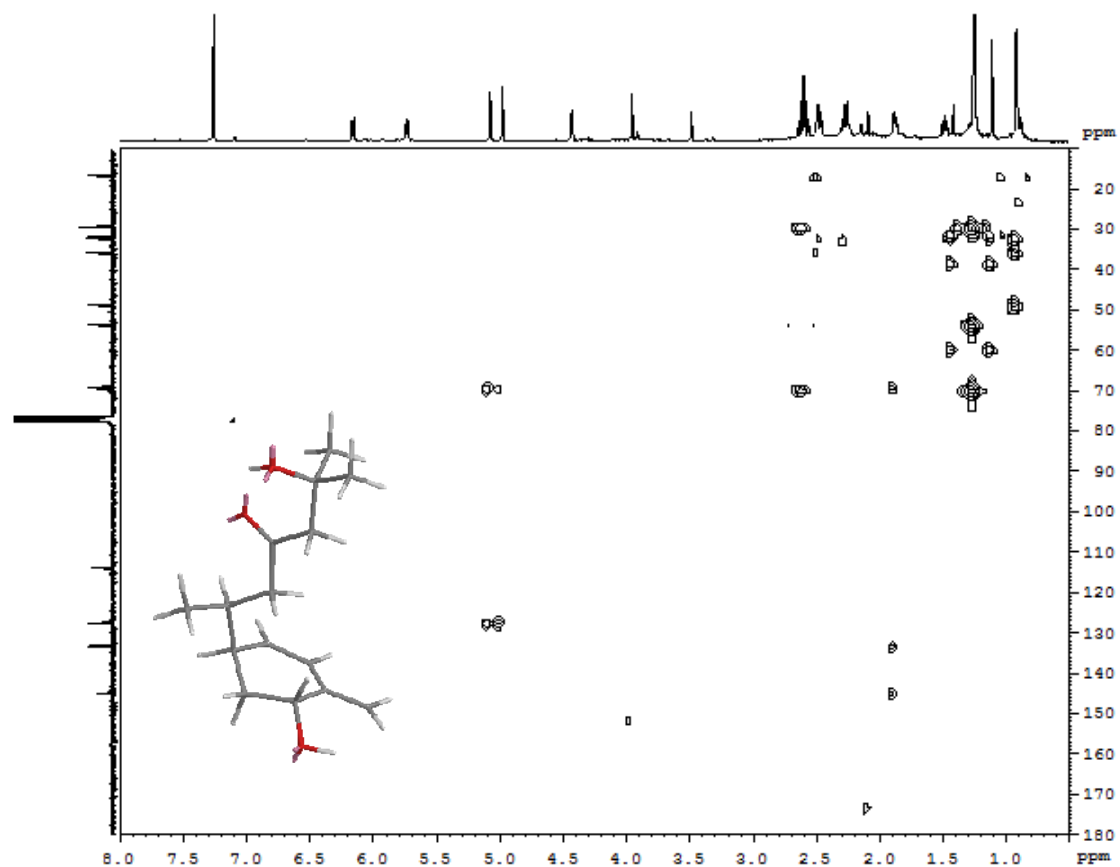

Figure S11 The NOESY spectrum of compound 1 in CDCl<sub>3</sub>

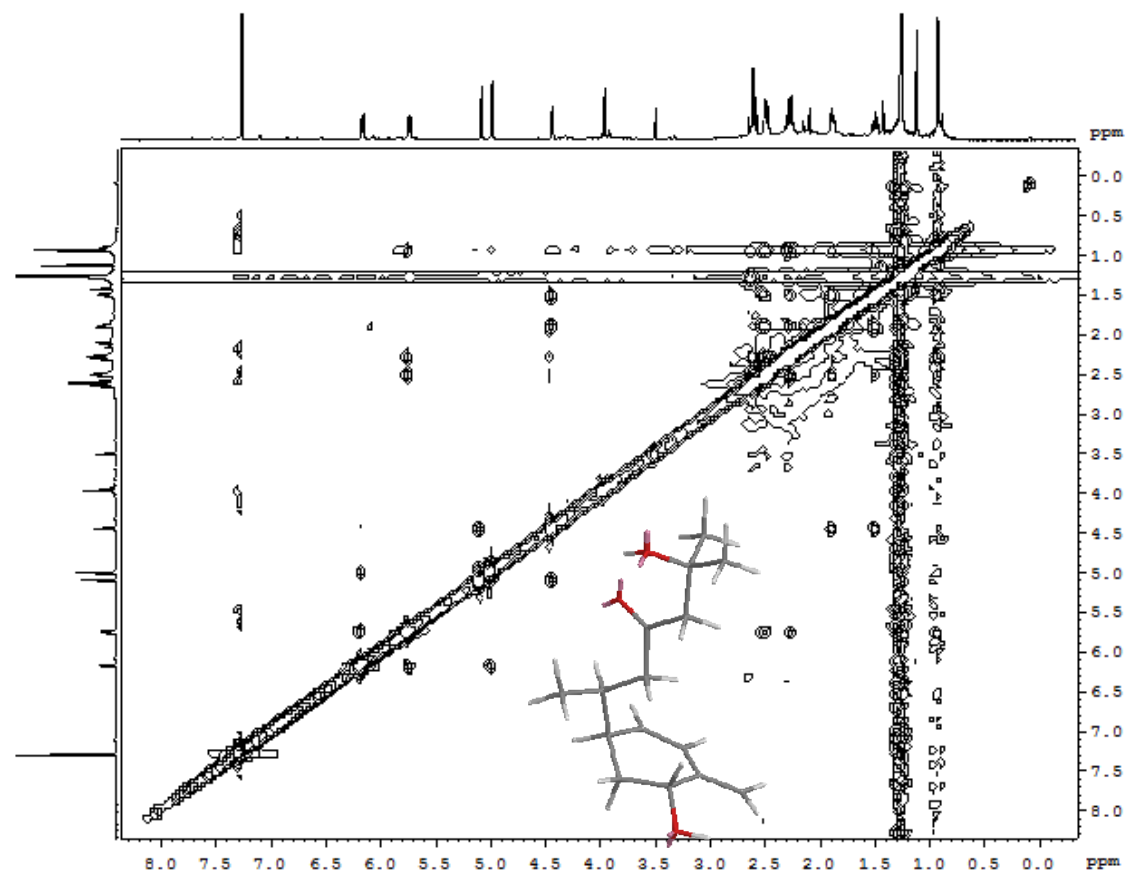

**Figure S12.** The  $^1\text{H}$ - $^1\text{H}$  COSY spectrum of compound 1.

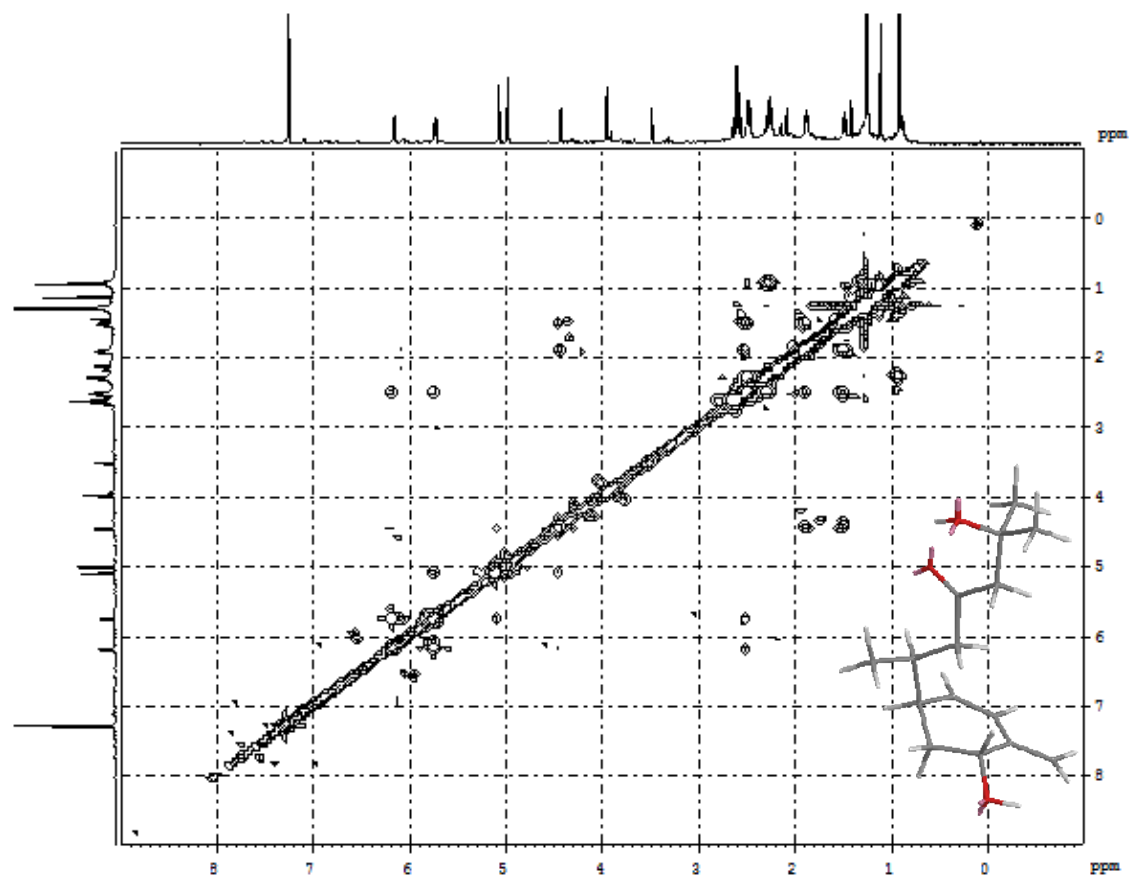

**Figure S13** The  $^1\text{H}$  NMR spectrum of compound 2 in  $\text{CDCl}_3$

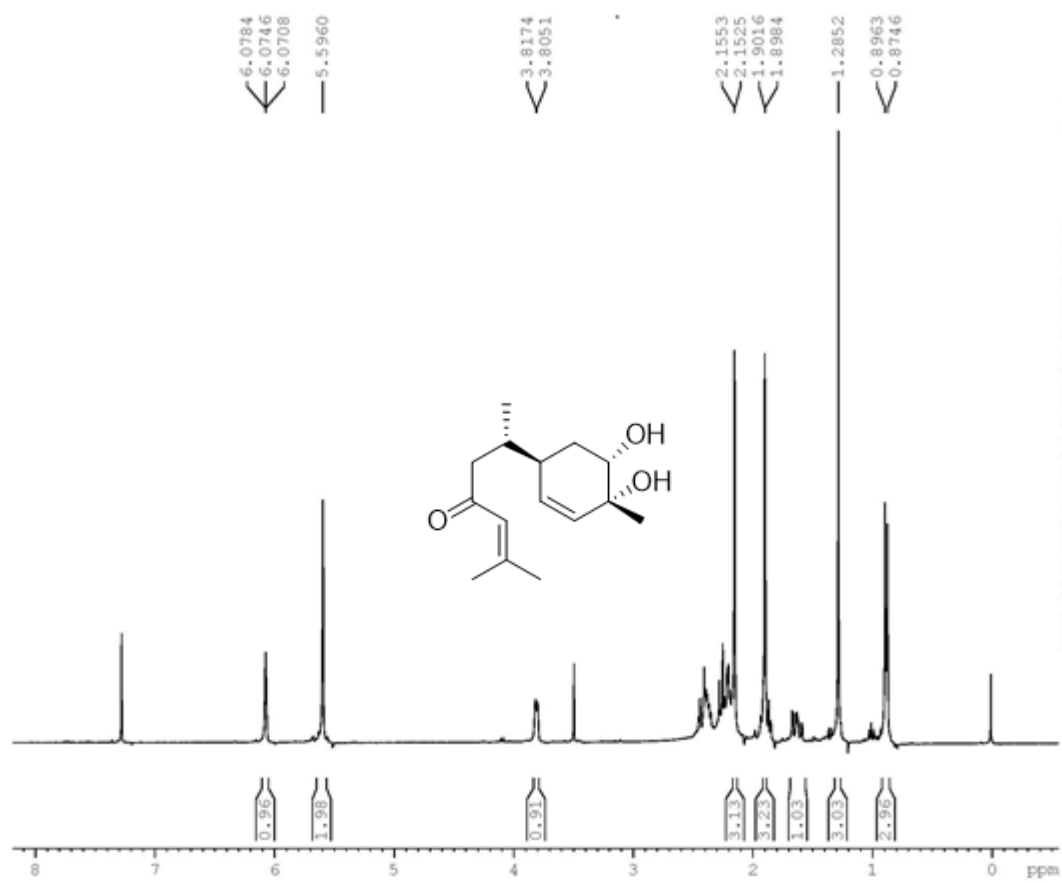

Figure S14 The <sup>13</sup>C NMR spectrum of compound 2 in CDCl<sub>3</sub>

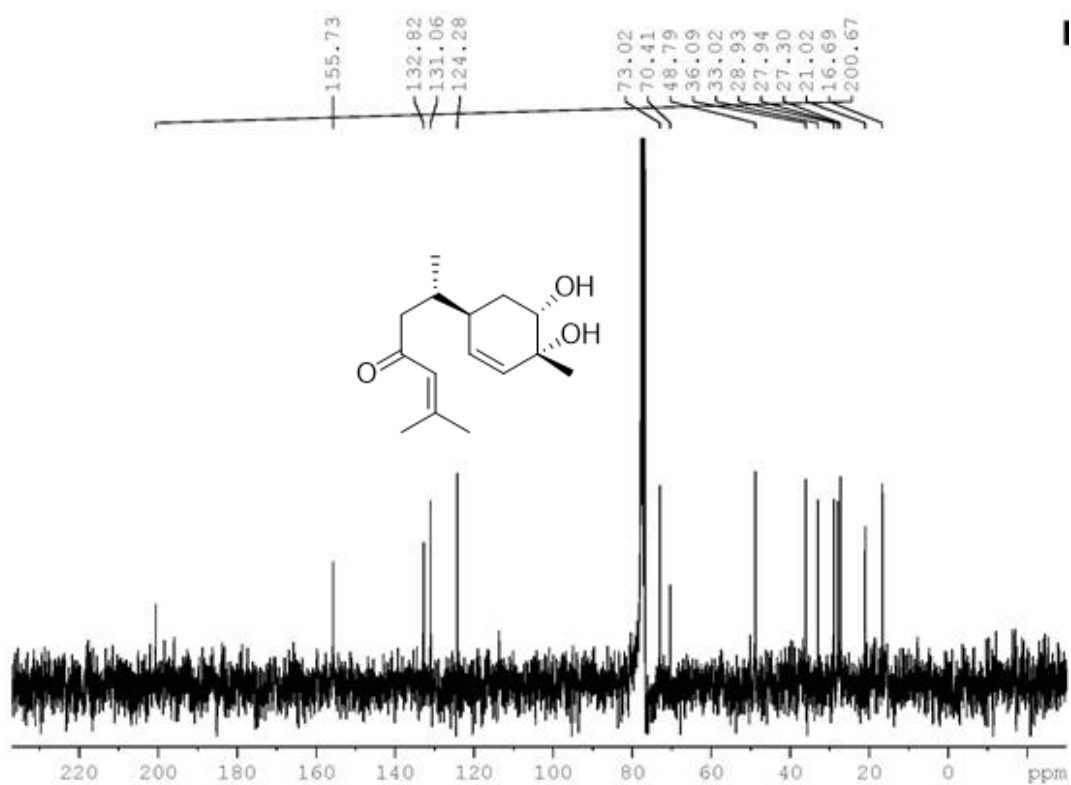

Figure S15 The  $^1\text{H}$  NMR spectrum of compound 3 in  $\text{CDCl}_3$

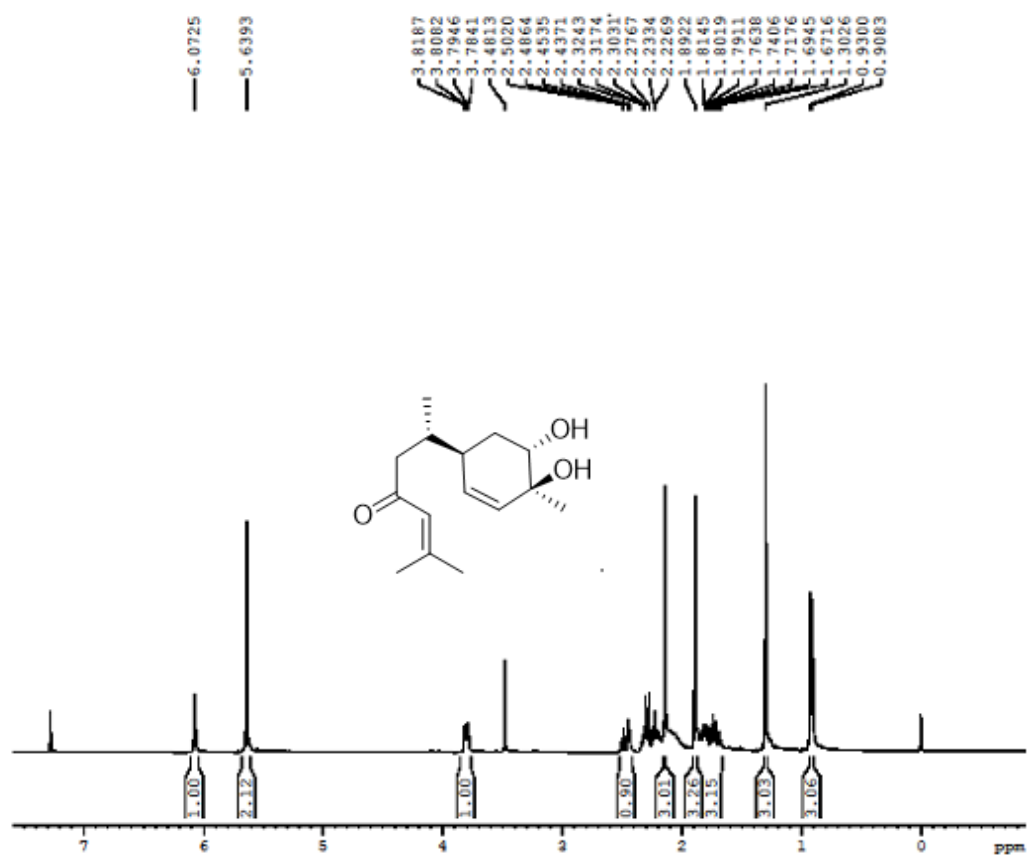

Figure S16 The  $^{13}\text{C}$  NMR spectrum of compound 3 in MeOH

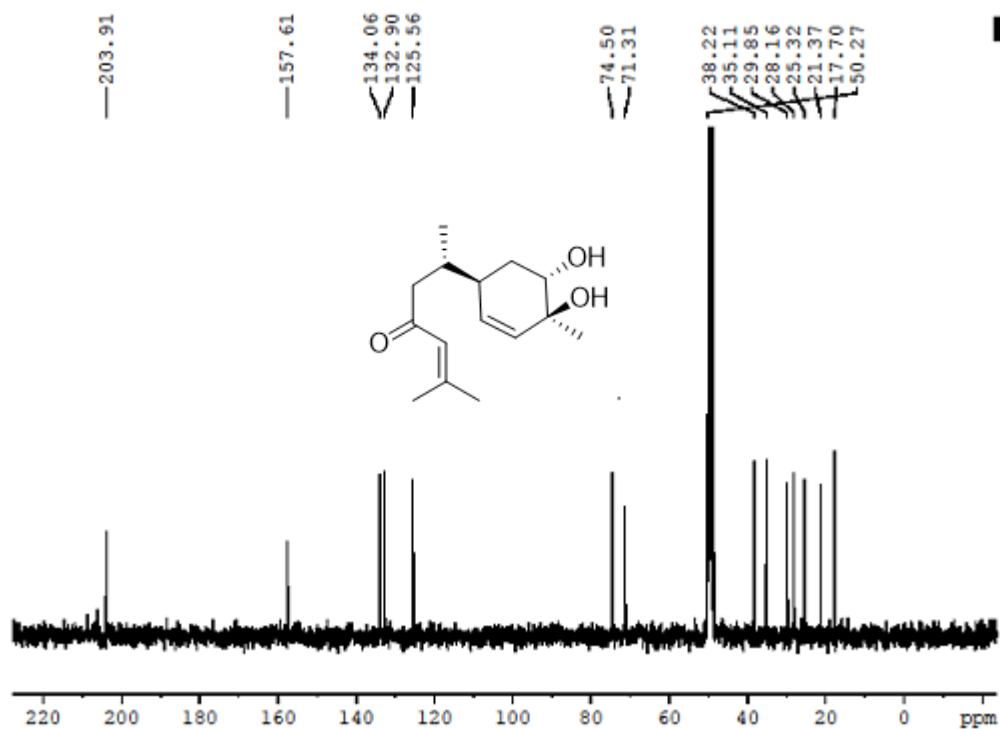

Figure S17 The <sup>1</sup>H NMR spectrum of compound 4 in CDCl<sub>3</sub>

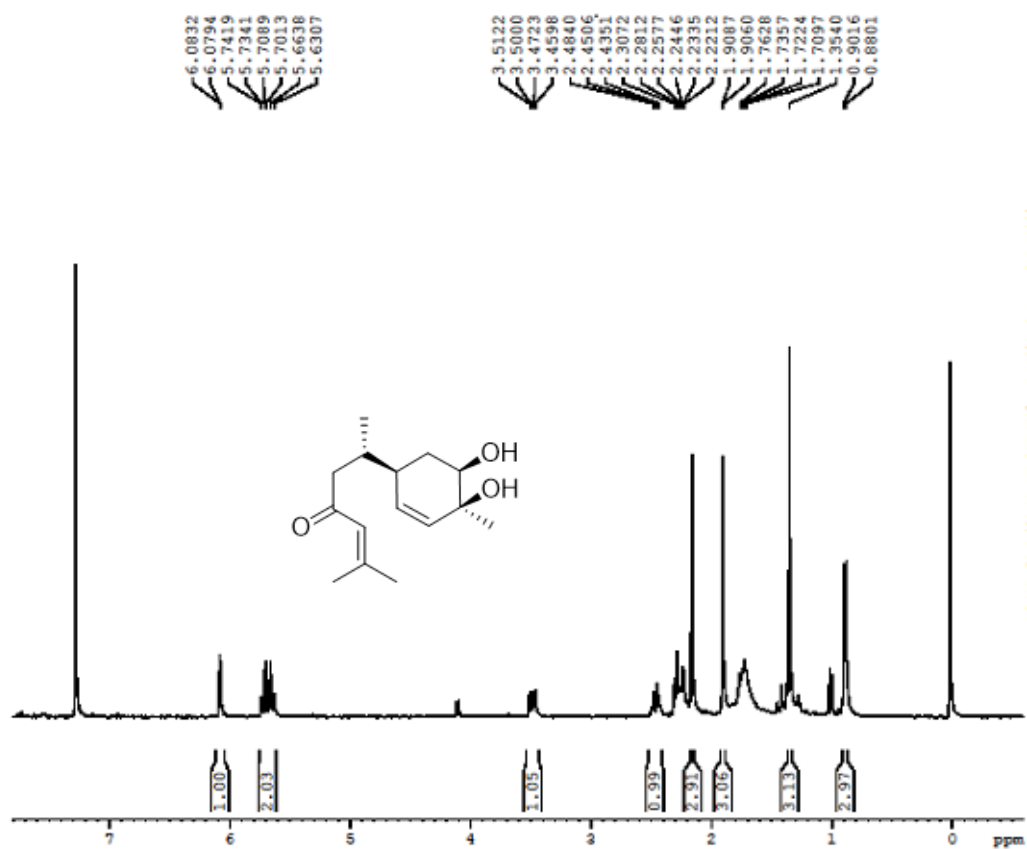

Figure S18 The  $^{13}\text{C}$  NMR spectrum of compound 4 in  $\text{CDCl}_3$

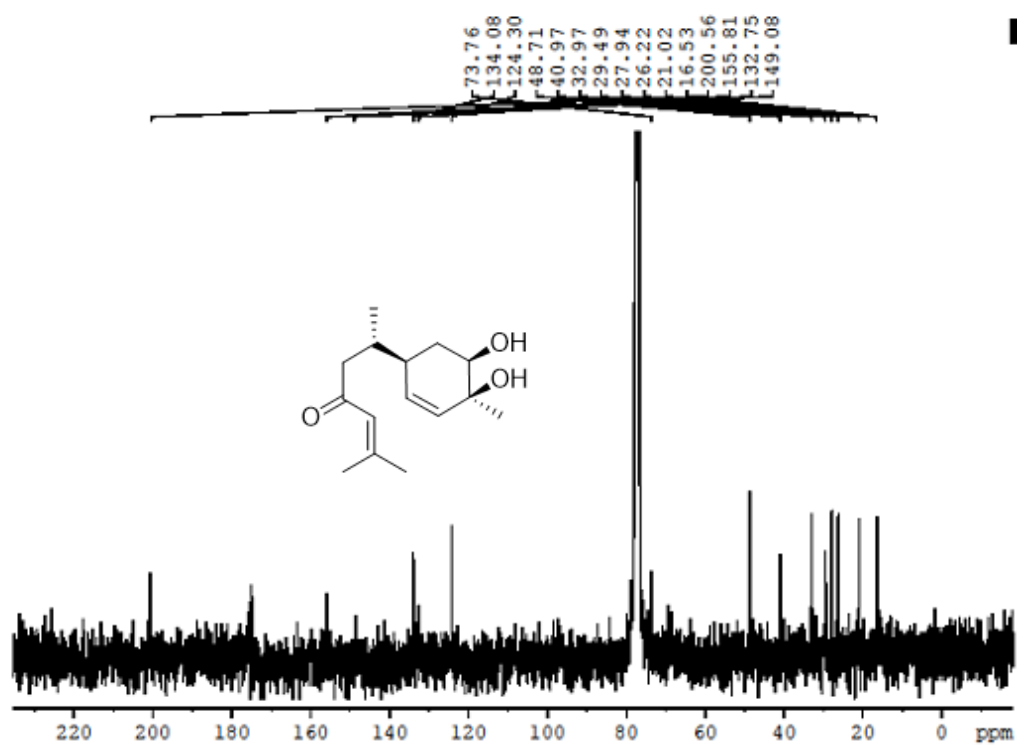

Figure S19 The  $^1\text{H}$  NMR spectrum of compound 5 in  $\text{DMSO}-d_6$



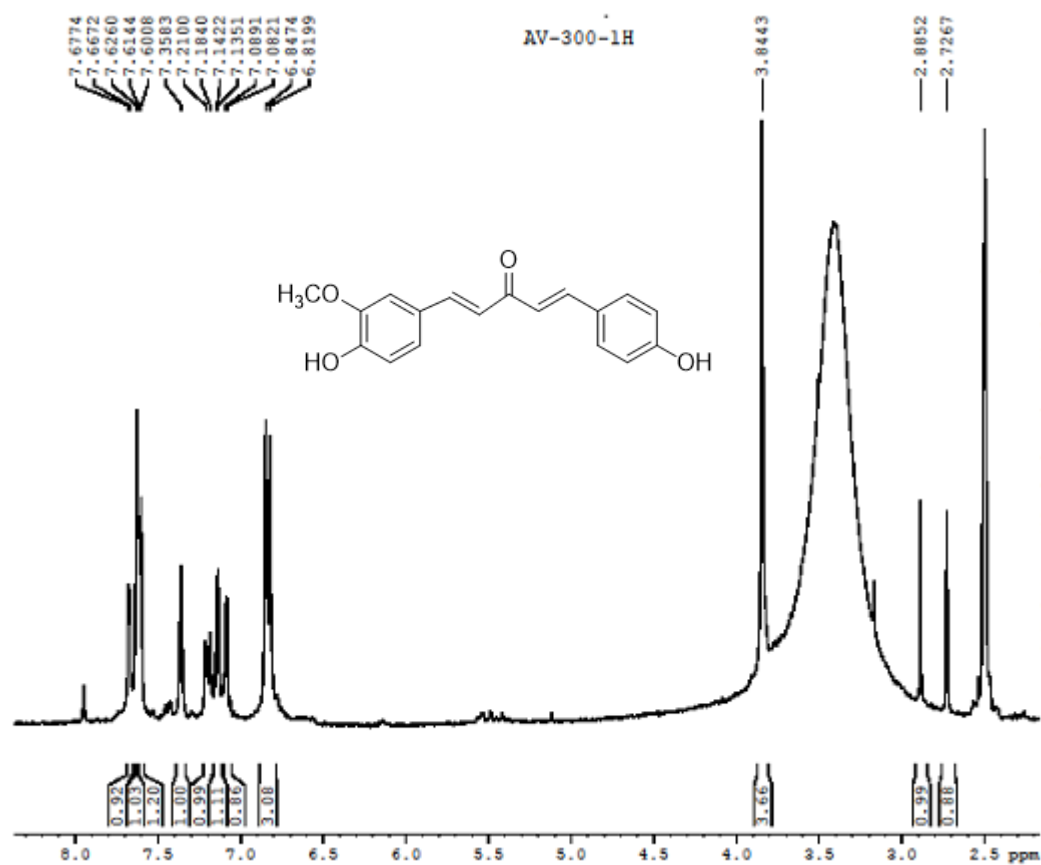

Figure S20 The <sup>13</sup>C NMR spectrum of compound 5 in DMSO-*d*<sub>6</sub>

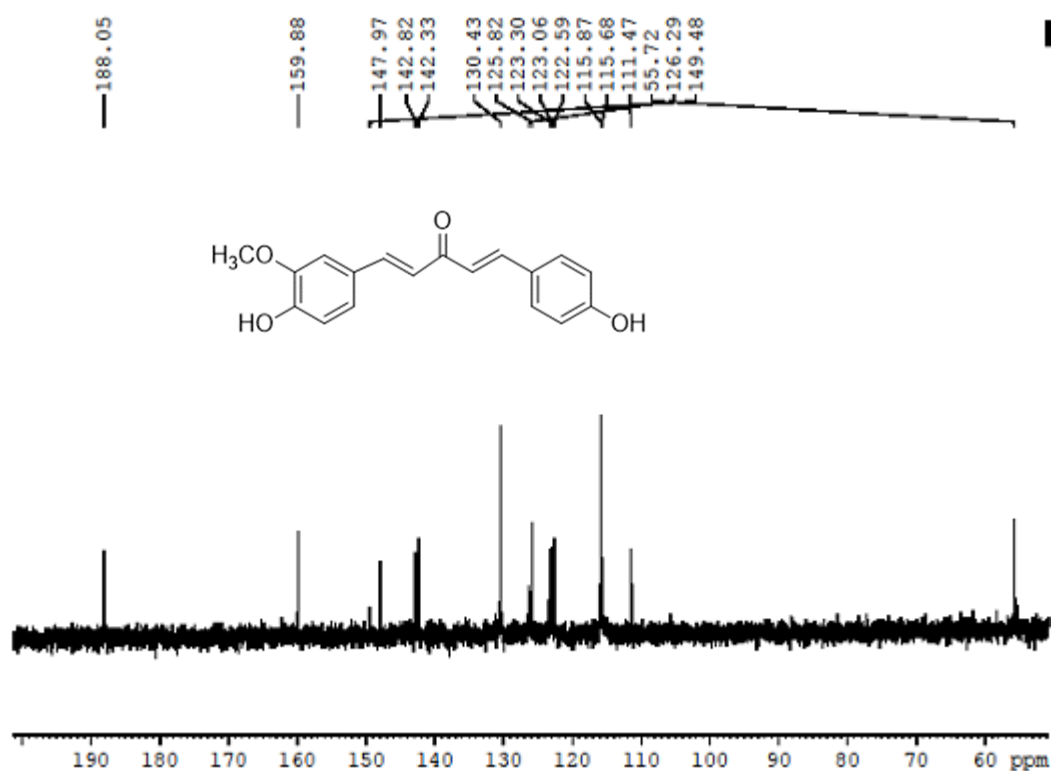

Figure S21 The  $^1\text{H}$  NMR spectrum of compound 6 in  $\text{DMSO}-d_6$

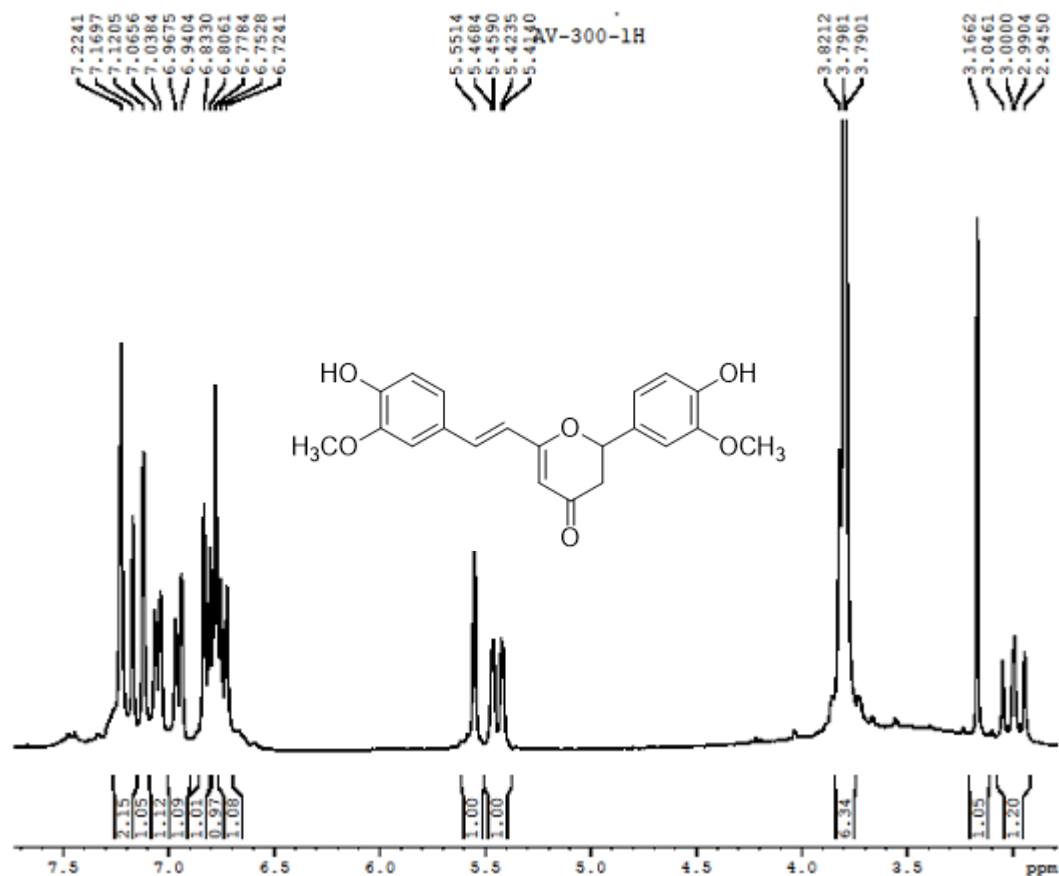

Figure S22 The  $^{13}\text{C}$  NMR spectrum of compound 6 in  $\text{DMSO}-d_6$

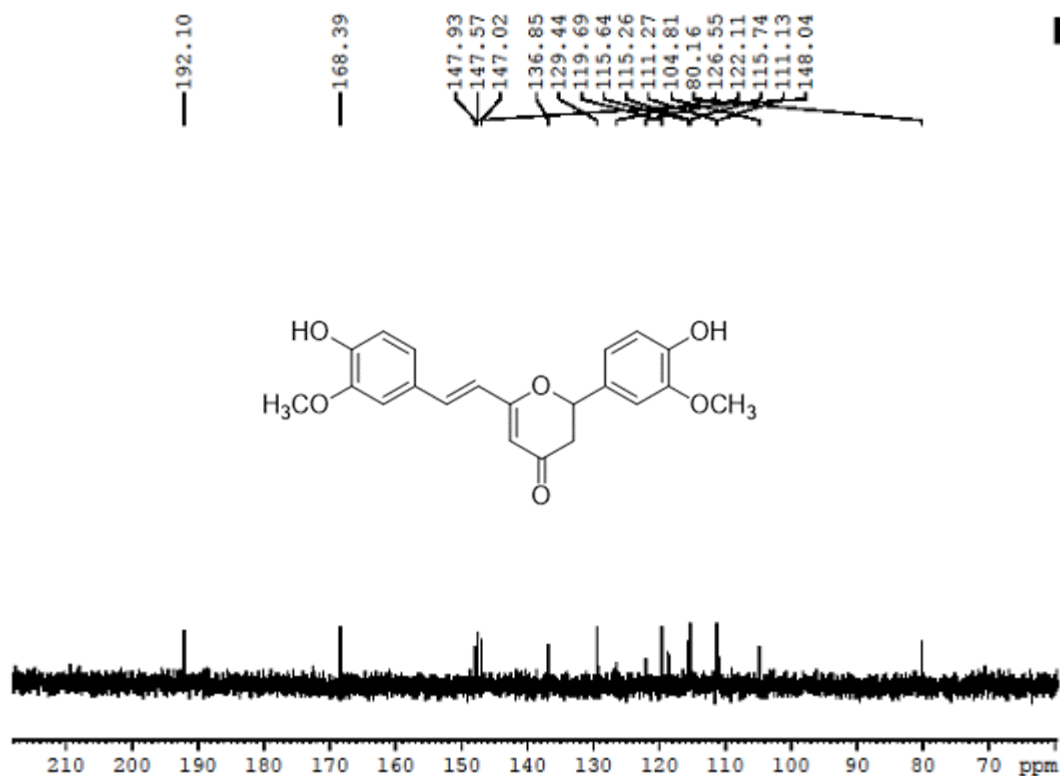

Figure S23 The <sup>1</sup>H NMR spectrum of compound 7 in DMSO-*d*<sub>6</sub>

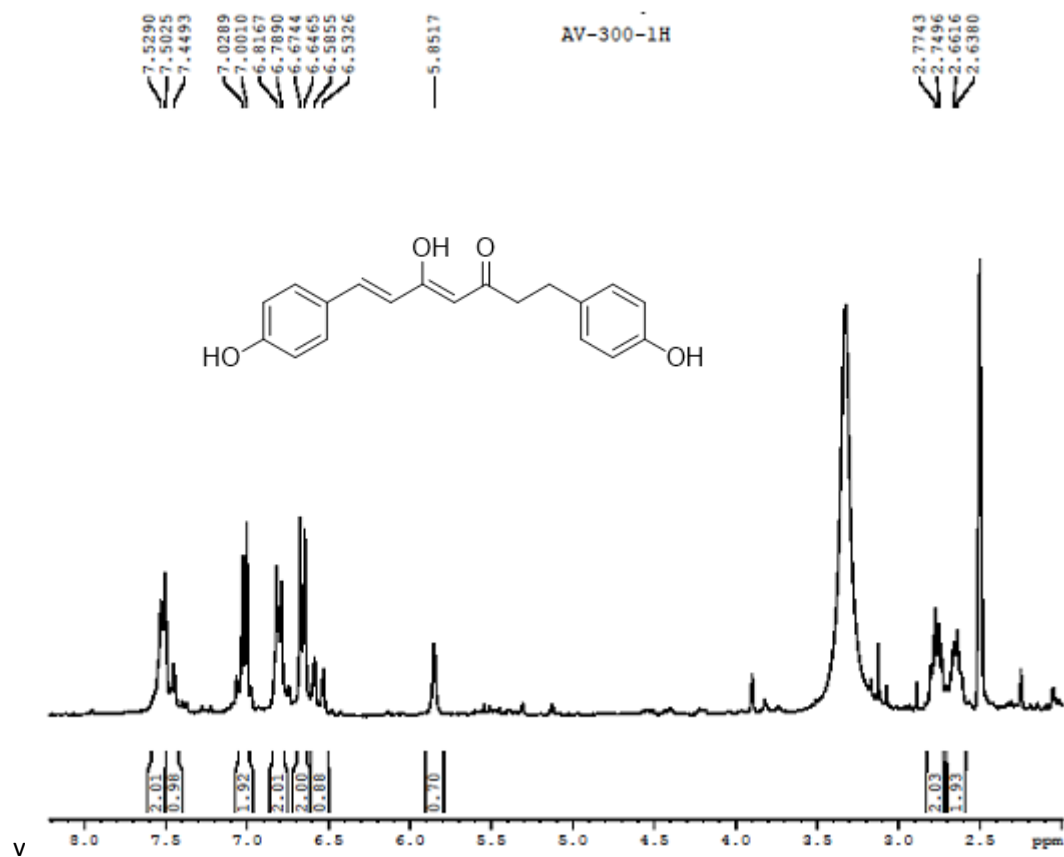

Figure S24 The  $^{13}\text{C}$  NMR spectrum of compound 7 in  $\text{DMSO}-d_6$

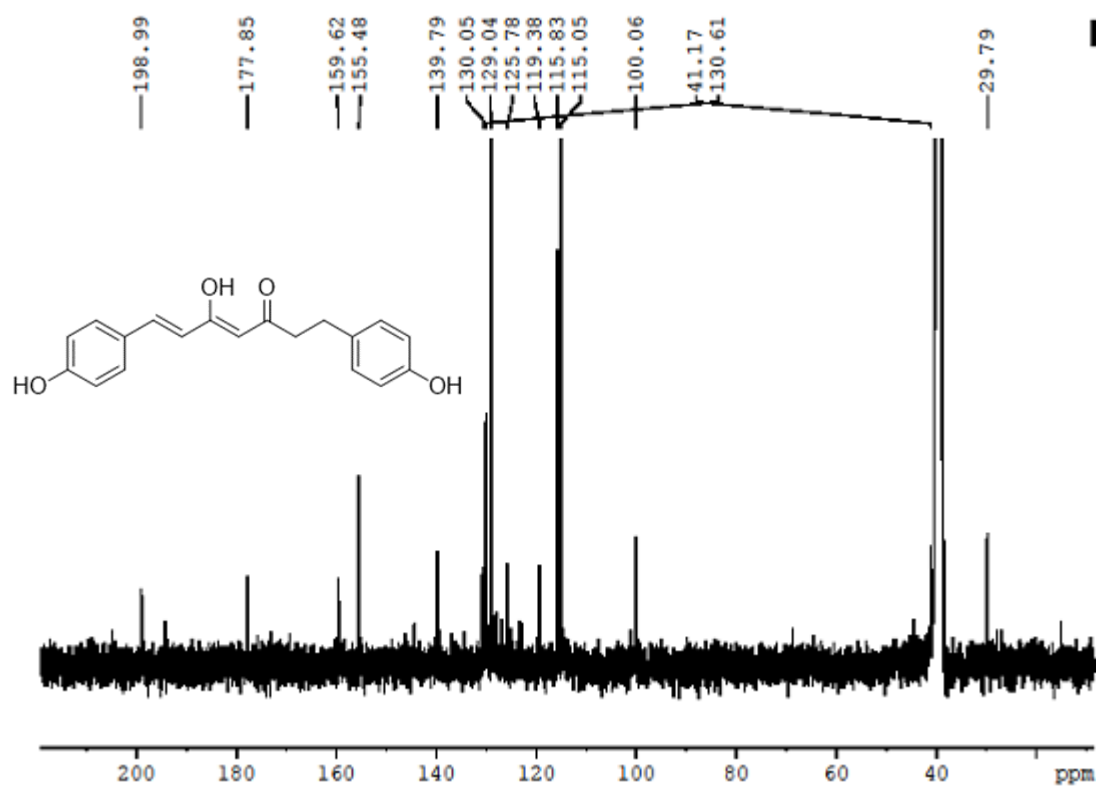

Supplement: Supplementary file 1 [file 8925997]
